# Supplementary material for: Compound and Dose-Dependent Effects of Two Neonicotinoid Pesticides on Honey Bee (Apis mellifera) Metabolic Physiology
Source: MDPI journal article supplement (doi:10.3390/insects10010018), 2019-01-08
Supplement: s1 [file s1]

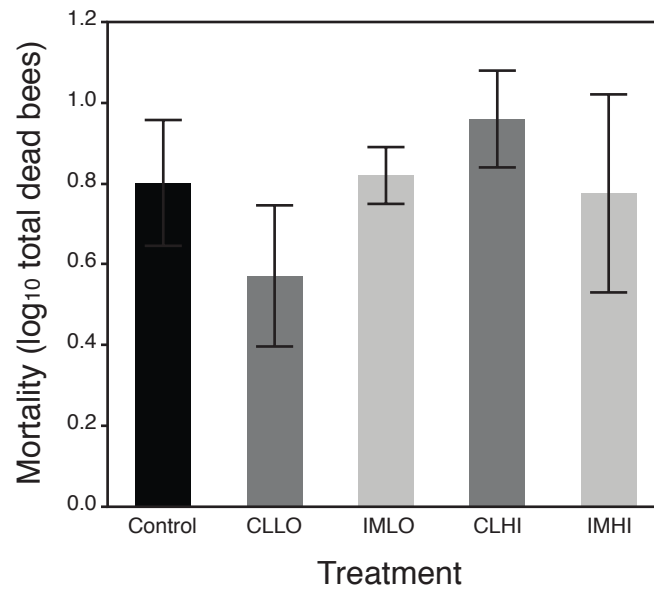

Figure S1. Mean ( $\pm$  s.e.m)  $\log_{10}$ -transformed number of dead honey bees in cages after two weeks of oral exposure to two neonicotinoids. Black bar=Control treatment; Dark grey bars=Clothianidin Low (CLLO) and High (CLHI) dose treatments; Light grey bars=Imidacloprid Low (IMLO) and High (IMHI) dose treatments.
